# Supplementary material for: Hypoxia-Inducible Expression of Annexin A6 Enhances the Resistance of Triple-Negative Breast Cancer Cells to EGFR and AR Antagonists
Source: MDPI journal article supplement (doi:10.3390/cells11193007), 2022-09-27
Supplement: s1 [file s1]

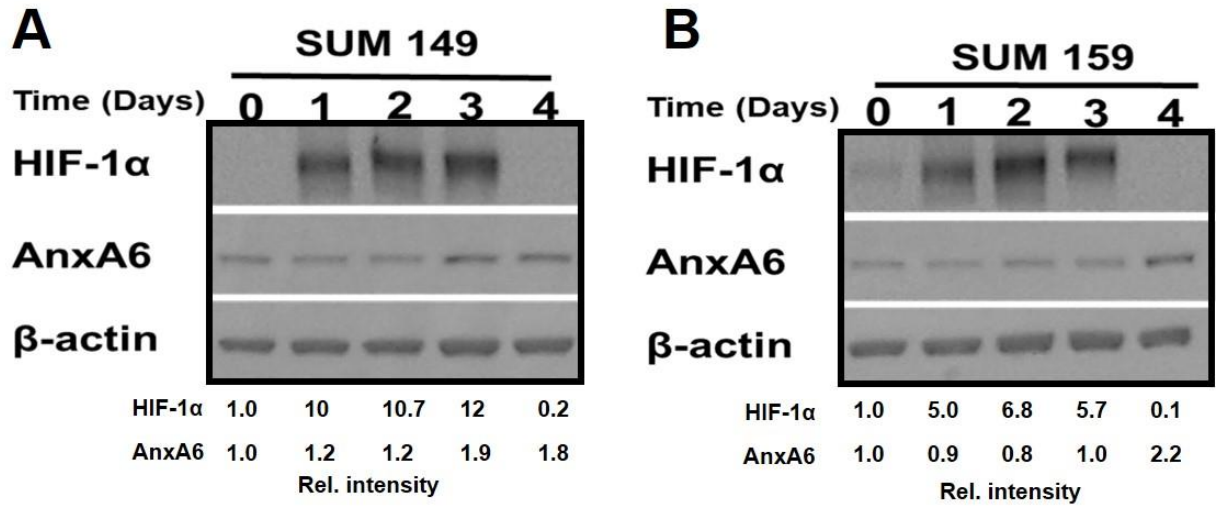

**Figure S1. Differential response SUM 149 and SUM 159 TNBC cell lines to hypoxic conditions.** (A-B) Representative SUM 149 and SUM 159 TNBC cell lines were incubated in acute ( $\leq 24$  h) or chronic ( $\geq 24$  h) hypoxic conditions (37°C; 1% O<sub>2</sub>; 5% CO<sub>2</sub>; 94% N<sub>2</sub>). Whole cell lysates were prepared and assessed by western blotting using the antibodies against indicated proteins. Detection of  $\beta$ -actin was used as a loading control.

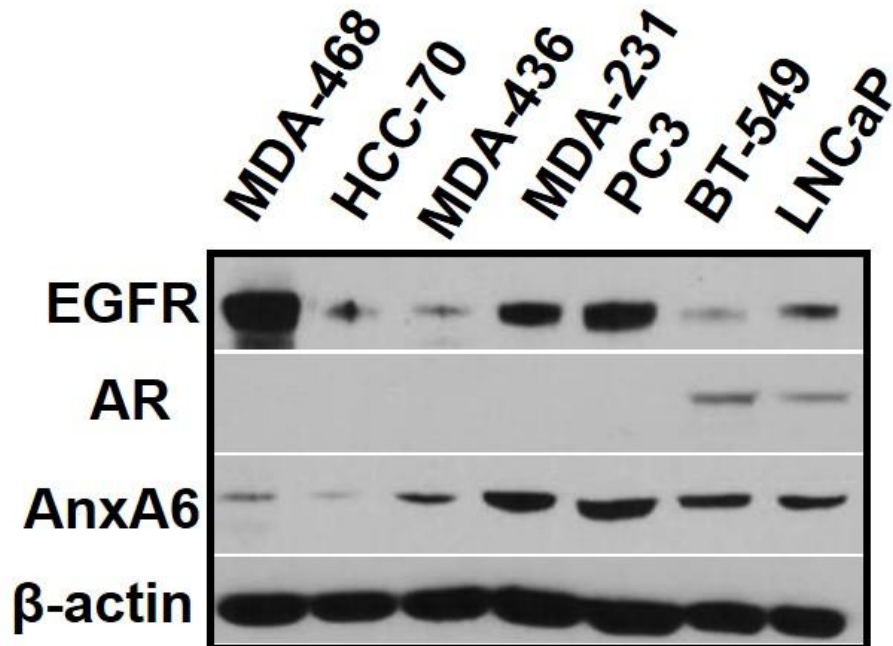

**Figure S2. EGFR and AR expression status in TNBC and PCa cell lines.** Panel of TNBC (MDA-468, HCC-70, MDA-436, MDA-231, and BT-549) and PCa (PC3 and LNCaP) cell lines. Whole cell lysates were

prepared and assessed by western blotting using the antibodies against EGFR, AR, and AnxA6. Detection of  $\beta$ -actin was used as a loading control.

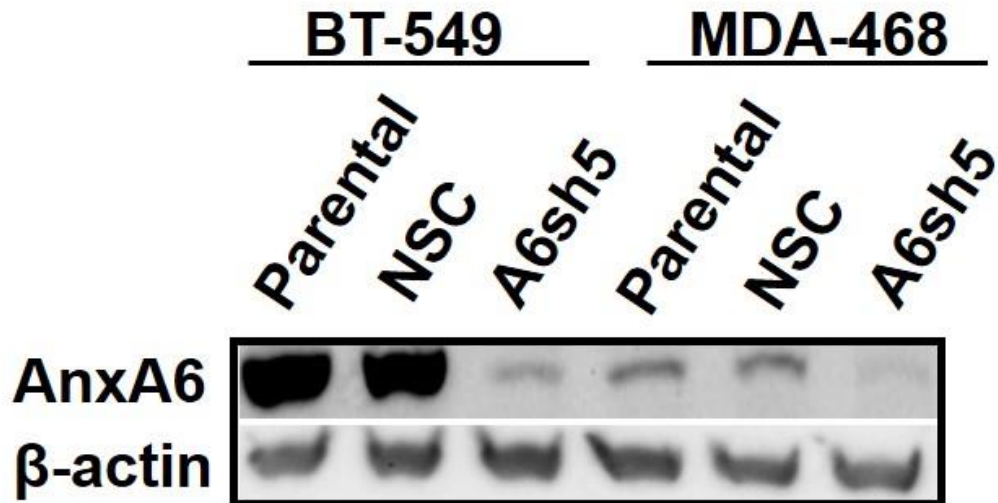

**Figure S3. Expression of AnxA6 in TNBC cell lines.** Representative western blot showing basal levels of AnxA6 in AnxA6-targeting NSC and A6sh5 cell lines. Whole cell lysates were prepared and assessed by western blotting using the antibodies against AnxA6. Detection of  $\beta$ -actin was used as a loading control.
